# Supplementary material for: Formation of N3− during interaction of NO with reduced ceria
Source: Royal Society of Chemistry journal article supplement (doi:10.1039/c5cc00500k), 2015-01-01
Supplement: c5cc00500k1.pdf [file c5cc00500k1.pdf]

## Formation of $\text{N}_3^-$ during interaction of NO with reduced ceria

Mihail Y. Mihaylov,<sup>a</sup> Elena Z. Ivanova,<sup>a</sup> Hristiyan A. Aleksandrov,<sup>b</sup> Petko St. Petkov,<sup>b</sup> Georgi N. Vayssilov,<sup>b,\*</sup> and Konstantin I. Hadjiivanov<sup>a,\*</sup>

<sup>a</sup> Institute of General and Inorganic Chemistry, Bulgarian Academy of Sciences, Sofia 1113, Bulgaria. Fax: 00 3592 8705024; Tel: 00 3592 979 3598; E-mail: kih@svr.igic.bas.bg

<sup>b</sup> Faculty of Chemistry and Pharmacy, University of Sofia, 1126 Sofia, Bulgaria; E-mail: gnv@chem.uni-sofia.bg

### ELECTRONIC SUPPLEMENTARY INFORMATION (ESI)

#### 1. Background spectra of the oxidized and reduced ceria

The spectrum of the activated  $\text{CeO}_2(\text{A})$  sample (Figure S1, spectrum a) contains bands in the OH region that are typical of ceria.<sup>1-5</sup> In particular, the most intense band at  $3654\text{ cm}^{-1}$  and the shoulder at  $3635\text{ cm}^{-1}$  are assigned to two kinds of type II hydroxyls, (i.e., oxygen bound to two cerium cations).<sup>1-5</sup> The weak band at  $3494\text{ cm}^{-1}$  is attributed to type III hydroxyls.<sup>3</sup> In agreement with published reports,<sup>1,2</sup> after reduction the spectrum in the OH region changes, and the type II OH bands are shifted to  $3680$  and  $3640\text{ cm}^{-1}$ .

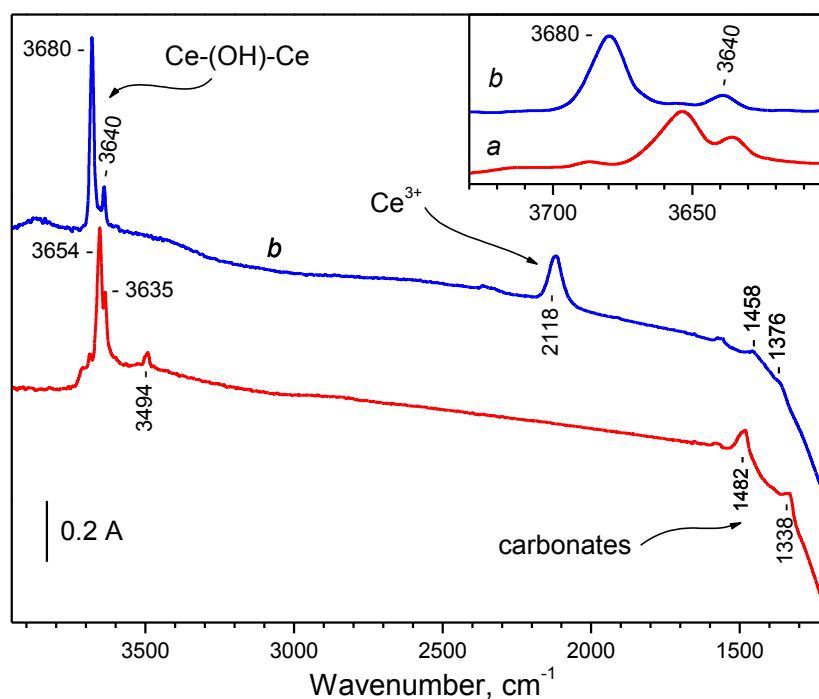

**Figure S1.** FTIR spectra of activated (a) and reduced (b)  $\text{CeO}_2(\text{A})$  sample.

Two bands, at 1482 and 1338  $\text{cm}^{-1}$ , are observed with the oxidized sample and are assigned to residual carbonate structures that are normally present on activated samples.<sup>5-7</sup> Reduction leads to a shift of the maxima of the carbonate bands to 1458 and 1376  $\text{cm}^{-1}$  and decrease in their intensities (Figure S1, spectrum b).

Finally, a band at 2118  $\text{cm}^{-1}$  was detected only with the reduced sample. It is due to the  ${}^2F_{5/2} \rightarrow {}^2F_{7/2}$  electronic transitions of the  $\text{Ce}^{3+}$  ions formed during reduction<sup>8</sup>.

## 2. Adsorption of small amounts of NO and ${}^{15}\text{NO}$ on ceria

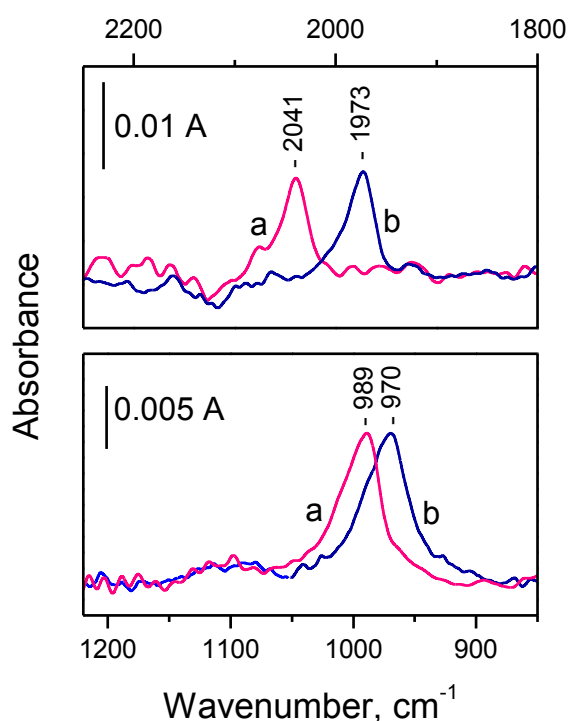

**Figure S2.** FTIR spectra of small amounts ( $10 \mu\text{mol g}^{-1}$ ) of NO (a) and  ${}^{15}\text{NO}$  (b) adsorbed on reduced  $\text{CeO}_2(\text{A})$  sample. The spectra are background corrected.

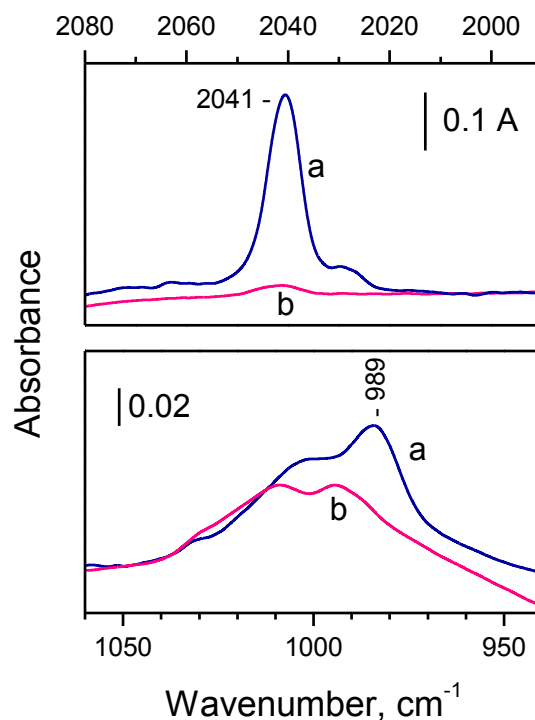

**Figure S3.** FTIR spectra of NO adsorbed on CeO<sub>2</sub>(A) (a) and CeO<sub>2</sub>(B) (b) samples. The spectra are chosen in order to show the maximal intensities in the bands in the region.

### 3. Statistical distribution of N<sub>3</sub><sup>-</sup> species with different numbers of <sup>15</sup>N atoms.

Consider the formation of N-N bond during NO adsorption. Adsorption of a 1 : 1 <sup>14</sup>NO + <sup>15</sup>NO isotopic mixture should lead to formation of species containing, in average, equal number of <sup>14</sup>N and <sup>15</sup>N atoms. Statistically, the following species should be formed in equal concentrations: <sup>14</sup>N-<sup>14</sup>N; <sup>14</sup>N-<sup>15</sup>N; <sup>15</sup>N-<sup>14</sup>N and <sup>15</sup>N-<sup>15</sup>N. If the two N-atoms are equivalent, the distribution will be: 25 % <sup>14</sup>N-<sup>14</sup>N; 50 % <sup>14</sup>N-<sup>15</sup>N; and 25 % <sup>15</sup>N-<sup>15</sup>N.

In the case when an N-N-N bond is formed, according to the statistical distribution each of the following species will be with 12.5 % population: <sup>14</sup>N-<sup>14</sup>N-<sup>14</sup>N, <sup>14</sup>N-<sup>14</sup>N-<sup>15</sup>N, <sup>14</sup>N-<sup>15</sup>N-<sup>14</sup>N, <sup>15</sup>N-<sup>14</sup>N-<sup>14</sup>N, <sup>14</sup>N-<sup>15</sup>N-<sup>15</sup>N, <sup>15</sup>N-<sup>14</sup>N-<sup>15</sup>N, <sup>15</sup>N-<sup>15</sup>N-<sup>14</sup>N and <sup>15</sup>N-<sup>15</sup>N-<sup>15</sup>N. If the species are symmetric, the distribution will be: 12.5 % - <sup>14</sup>N-<sup>14</sup>N-<sup>14</sup>N; 25 % - <sup>14</sup>N-<sup>14</sup>N-<sup>15</sup>N, 12.5 % <sup>14</sup>N-<sup>15</sup>N-<sup>14</sup>N; 12.5 % <sup>15</sup>N-<sup>15</sup>N-<sup>15</sup>N; 25 % - <sup>14</sup>N-<sup>15</sup>N-<sup>15</sup>N and 12.5 % <sup>14</sup>N-<sup>15</sup>N-<sup>14</sup>N. Therefore, in this case 6 types of species will be observed and

the concentration of the species having one terminal N atom differing from the others will be two times higher than the concentration of the other species.

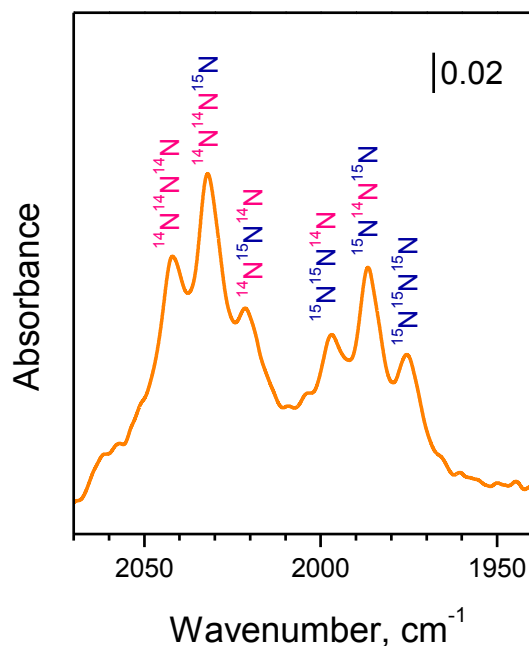

**Figure S4.** FTIR spectra of azide ions produced after adsorption of a  $^{14}\text{NO} + ^{15}\text{NO}$  isotopic mixture (molar ratio ca. 3 : 2) on reduced ceria. The isotopic distribution of labelled.

This is consistent with the spectrum shown on Fig. S3. The slightly higher intensity of the bands characterizing  $^{14}\text{N}$ -rich species is due to the slightly higher concentration of  $^{14}\text{NO}$  in the  $^{14}\text{NO} + ^{15}\text{NO}$  isotopic mixture.

#### 4. Oxidation of azide species on ceria

They azide species on ceria are highly stable at 298 K in the presence of NO at low equilibrium pressure. At high NO equilibrium pressure the azide bands slowly start to decrease in intensity. Similarly, the azides are stable in presence of  $\text{O}_2$  alone at 298 K. Figure S4 demonstrates the effect of successive addition of small dosed of  $\text{O}_2$  to azide species formed after NO adsorption (present in the gas phase). The gradual disappearance of the azide bands in the co-presence of NO and  $\text{O}_2$  is seen. Note that no intermediate bands in the region were observed. Note that, except of the slight shift of the azide bands, the only effect if a gradual decrease in intensity and ultimate disappearance. No intermediate bands assignable to N-N bonds were detected.

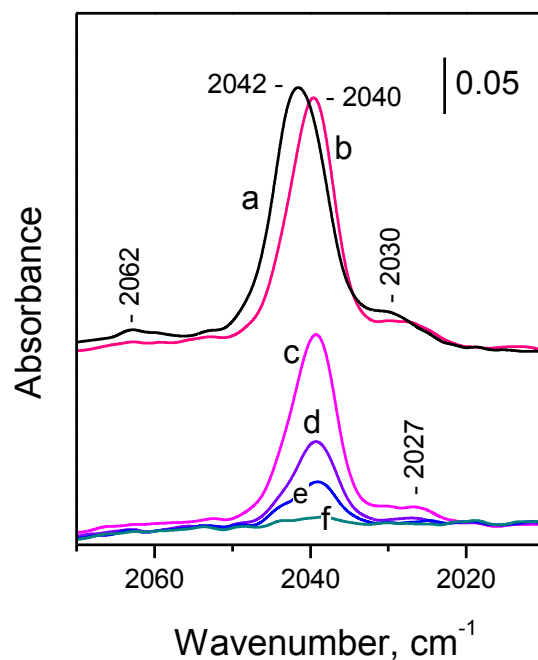

**Figure S5.** Azide species formed on reduced CeO<sub>2</sub>(A) sample after adsorption of a NO at equilibrium pressure of 300 Pa) (a) and development of the spectra after successive addition of small amounts of O<sub>2</sub> to the system (b-f). The spectra are background corrected.

#### REFERENCES:

- 1 Badri, A.; Binet, C.; Lavalley, J. C., *J. Chem. Soc., Faraday Trans.* 1996, 92, 4669–4673.
- 2 Daturi, M.; Finocchio, E.; Binet, C.; Lavalley, J. C.; Fally, F.; Perrichon V., *J. Phys. Chem. B* 1999, 103, 4884–4891.
- 3 Agarwal, S.; Lefferts, L.; Mojet, B. L., *ChemCatChem* 2013, 5, 479–489.
- 4 Farra, R.; Wrabetz, S.; Schuster, M. E.; Stotz, E.; Hamilton, N. G.; Amrute, A. P.; Pérez-Ramírez, J.; López, N.; Teschner, D., *Phys. Chem. Chem. Phys.* 2013, 15, 3454–3465.
- 5 Vayssilov, G. N.; Mihaylov, M.; Petkov, P. St.; Hadjiivanov, K. I.; Neyman, K., *J. Phys. Chem. C* 2011, 115, 23435–23454.
- 6 Martínez-Arias, A.; Soria, J.; Conesa, J. C.; Seoane, X. L.; Arcoya, A.; Cataluña, R., *J. Chem. Soc., Faraday Trans.* 1995, 91, 1679–1687.
- 7 Niwa, M.; Furukawa, Y.; Murakami, Y., *J. Colloid Interface Sci.* 1982, 86, 260–265.
- 8 Binet, C.; Badri, A.; Lavalley, J.-C., *J. Phys. Chem.* 1994, 98, 6392–6398.
